# Supplementary material for: Significant impacts of NO2 and NH3 on the sulfate formations on the surface of nano MgO particles in a smog chamber
Source: Royal Society of Chemistry journal article supplement (doi:10.1039/d2en00142j), 2022-01-01
Supplement: d2en00142j1.pdf [file d2en00142j1.pdf]

## Supplementary Information

### Significant impacts of NO<sub>2</sub> and NH<sub>3</sub> on the sulfate formations on the surface of nano MgO particles in a smog chamber

Lihui Han<sup>1\*</sup>, Jianshuo Cui<sup>1</sup>, Xinhang Liu<sup>1</sup>, Xuemei Yang<sup>1</sup>, Shuiyuan Cheng<sup>1</sup>, Wei Wei<sup>1</sup>,  
Haiyan Wang<sup>1</sup>, Jinghua Guo<sup>2</sup>, Aihua Zheng<sup>2</sup>

1. Key Laboratory of Beijing on Regional Air Pollution Control, Faculty of Environment  
and Life, Beijing University of Technology, Beijing 100124, China

2. Analysis and Testing Center, Beijing Normal University, Beijing 100875, China

Correspondence to L. H. Han ([hlh@bjut.edu.cn](mailto:hlh@bjut.edu.cn))

Table S1 Characteristics of instruments used in the smog chamber experiments

| Instrument                                   | Producer and Model                                 | Functions                                                        | Performance Index                                                                                                                                                                                            |
|----------------------------------------------|----------------------------------------------------|------------------------------------------------------------------|--------------------------------------------------------------------------------------------------------------------------------------------------------------------------------------------------------------|
| Zero-air generator                           | Thermo Fisher Science, Model-111                   | Provides zero air                                                | Maximum flow 20 L min <sup>-1</sup> ; HC < 0.1ppm; NO < 0.5 ppb; NO <sub>2</sub> < 0.5 ppb; O <sub>3</sub> < 0.8 ppb; SO <sub>2</sub> < 0.5 ppb; NH <sub>3</sub> < 0.5 ppb; RH < 5%; PM < 1 cm <sup>-3</sup> |
| O <sub>3</sub> generator                     | Beijing Tonglin Technology Co., Ltd, Model 3S-T3   | Provides O <sub>3</sub>                                          | Rate of 37.5 mg min <sup>-1</sup>                                                                                                                                                                            |
| O <sub>3</sub> generator                     | Thermo Fisher Scientific, Model-49i IPS            | Provides O <sub>3</sub>                                          | Flow: 4 L min <sup>-1</sup> ;<br>Range of 0-1000 ppb                                                                                                                                                         |
| Solid particle disperser                     | PALAS, RBG-1000                                    | Produces dry nanoscale particles                                 | Particle generation rate of 616 mg h <sup>-1</sup>                                                                                                                                                           |
| Aerosol neutralizer                          | SIMCO, Model-6110A                                 | Neutralizes electrical properties of particles                   | Dissipation time < 4 seconds<br>Ion balance < ±25V                                                                                                                                                           |
| SO <sub>2</sub> analyzer                     | Thermo Fisher Scientific, Model-43i                | Determinate concentration of SO <sub>2</sub>                     | Detection range 0-50 ppm;<br>Accuracy of ±1.0 ppb                                                                                                                                                            |
| NO-NO <sub>2</sub> -NO <sub>x</sub> analyzer | Thermo Fisher Scientific, Model-42i                | Determinate concentration of NO-NO <sub>2</sub> -NO <sub>x</sub> | Detection range 0-50 ppm;<br>Accuracy of ±1.0 ppb                                                                                                                                                            |
| O <sub>3</sub> analyzer                      | Thermo Fisher Scientific, Model-49i                | Determinate concentration of O <sub>3</sub>                      | Detection range 0-50 ppm;<br>Accuracy of ±1.0 ppb                                                                                                                                                            |
| NH <sub>3</sub> analyzer                     | Thermo Fisher Scientific, Model-17i                | Determinate concentration of NH <sub>3</sub>                     | Detection range 0-50 ppm;<br>Accuracy of ±1.0 ppb                                                                                                                                                            |
| Multi-Gas Calibrator                         | Thermo Fisher Scientific, Model-146i               | Calibration gas analyzer                                         | Provides accurate concentrations of SO <sub>2</sub> , NO <sub>2</sub> and NH <sub>3</sub> or other gases                                                                                                     |
| Particle size spectrometer                   | TOPAS, Model LAP322                                | Measure the size distribution of PM                              | Detection range of 200 nm-5 μm                                                                                                                                                                               |
| Particle sampler                             | MSP, Model 125R NanoMoudi-II TM                    | Membrane sampling PM                                             | Collect PM in 13 levels                                                                                                                                                                                      |
| Ion chromatography                           | Dionex™ ICS-2100; Thermo Fisher Scientific, Aquion | Measurement of water soluble anions and cations                  | Digital signal range: 0 to 15000 μS                                                                                                                                                                          |

Table S2 The initial conditions of SO<sub>2</sub> heterogeneous reactions on the surface of nano MgO aerosol particles in the different reaction systems in this study period

| Exp. No. | Reaction System           | React time (min) | Initial reaction conditions |                                    |        |        |                      |               |                       |                       |
|----------|---------------------------|------------------|-----------------------------|------------------------------------|--------|--------|----------------------|---------------|-----------------------|-----------------------|
|          |                           |                  | SO <sub>2</sub> (ppb)       | MgO Particle (μg m <sup>-3</sup> ) | T (°C) | RH (%) | O <sub>3</sub> (ppb) | Lamp (number) | NO <sub>2</sub> (ppb) | NH <sub>3</sub> (ppb) |
| 1        | SO <sub>2</sub> -MgO-dark | 240              | 239.91                      | 322.25                             | 21.5   | 24.5   | -                    | -             | -                     | -                     |
|          |                           |                  | 237.98                      | 315.46                             | 20.9   | 24.5   | -                    | -             | -                     | -                     |
| 2        |                           | 240              | 237.89                      | 690.45                             | 25.0   | 23.0   | -                    | -             | -                     | -                     |
|          |                           |                  | 240.63                      | 766.30                             | 24.7   | 19.1   | -                    | -             | -                     | -                     |
| 3        |                           | 240              | 238.15                      | 878.12                             | 24.2   | 40.2   | -                    | -             | -                     | -                     |
|          |                           |                  | 237.39                      | 937.25                             | 21.3   | 39.5   | -                    | -             | -                     | -                     |
| 4        |                           | 240              | 241.38                      | 1288.54                            | 23.4   | 61.4   | -                    | -             | -                     | -                     |
|          |                           |                  | 241.62                      | 1136.16                            | 23.8   | 60.8   | -                    | -             | -                     | -                     |
| 5        |                           | 240              | 239.64                      | 1130.62                            | 21.9   | 79.5   | -                    | -             | -                     | -                     |
|          |                           |                  | 241.45                      | 1035.28                            | 20.8   | 79.5   | -                    | -             | -                     | -                     |
| 6        |                           | 240              | 233.98                      | 1206.15                            | 20.9   | 15.8   | -                    | -             | 206.53                | -                     |
|          |                           |                  | 237.89                      | 1050.17                            | 16.1   | 17.8   | -                    | -             | 204.51                | -                     |
| 7        |                           | 240              | 225.89                      | 1231.90                            | 20.8   | 14.2   | -                    | -             | 389.45                | -                     |
|          |                           |                  | 240.41                      | 1137.25                            | 21.9   | 19.7   | -                    | -             | 395.46                | -                     |
| 8        |                           | 240              | 224.89                      | 1174.34                            | 23.7   | 18.6   | -                    | -             | 587.46                | -                     |
|          |                           |                  | 237.69                      | 1275.64                            | 18.3   | 19.5   | -                    | -             | 601.05                | -                     |
| 9        |                           | 285              | 248.18                      | 934.48                             | 21.7   | 11.9   | -                    | -             | -                     | 229.41                |
|          | 241.76                    |                  | 895.25                      | 16.1                               | 17.7   | -      | -                    | -             | 209.16                |                       |
| 10       | 285                       | 241.48           | 780.55                      | 23.5                               | 10.3   | -      | -                    | -             | 408.78                |                       |
|          |                           | 237.30           | 837.11                      | 18.2                               | 18.7   | -      | -                    | -             | 405.93                |                       |
| 11       | 285                       | 233.38           | 820.15                      | 21.7                               | 12.4   | -      | -                    | -             | 603.28                |                       |
|          |                           | 239.02           | 856.24                      | 17.6                               | 22.6   | -      | -                    | -             | 597.17                |                       |
| 12       | SO <sub>2</sub> -MgO-hν   | 300              | 237.33                      | 319.67                             | 28.0   | 22.0   | -                    | 20            | -                     | -                     |
|          |                           |                  | 236.98                      | 314.55                             | 21.8   | 16.2   | -                    | 20            | -                     | -                     |
| 13       |                           | 300              | 241.91                      | 337.60                             | 26.6   | 21.2   | -                    | 40            | -                     | -                     |
|          |                           |                  | 235.89                      | 306.88                             | 17.6   | 18.6   | -                    | 40            | -                     | -                     |
| 14       |                           | 300              | 245.62                      | 546.98                             | 26.7   | 25.6   | -                    | 40            | -                     | -                     |
|          |                           |                  | 235.95                      | 502.34                             | 18.7   | 22.1   | -                    | 40            | -                     | -                     |
| 15       |                           | 300              | 240.41                      | 346.20                             | 21.3   | 18.4   | -                    | 40            | 105.37                | -                     |
|          |                           |                  | 243.14                      | 440.59                             | 22.0   | 19.8   | -                    | 40            | 102.67                | -                     |
| 16       |                           | 300              | 244.89                      | 564.52                             | 18.3   | 24.5   | -                    | 40            | 210.24                | -                     |
|          |                           |                  | 235.92                      | 489.76                             | 19.7   | 19.8   | -                    | 40            | 204.36                | -                     |
| 17       |                           | 300              | 239.00                      | 396.69                             | 22.1   | 23.7   | -                    | 40            | 401.91                | -                     |

|    |     |                       |        |        |      |      |        |    |        |        |
|----|-----|-----------------------|--------|--------|------|------|--------|----|--------|--------|
|    |     |                       | 241.06 | 486.27 | 16.5 | 20.3 | -      | 40 | 398.34 | -      |
| 18 | 300 |                       | 238.71 | 408.84 | 19.1 | 23.1 | -      | 40 | -      | 113.76 |
|    |     |                       | 211.00 | 420.00 | 22.1 | 22.6 | -      | 40 | -      | 110.00 |
| 19 | 300 |                       | 237.94 | 414.51 | 21.1 | 19.3 | -      | 40 | -      | 199.52 |
|    |     |                       | 231.18 | 406.55 | 18.9 | 24.2 | -      | 40 | -      | 199.08 |
| 20 | 300 |                       | 251.42 | 409.84 | 18.3 | 24.4 | -      | 40 | -      | 379.72 |
|    |     |                       | 238.06 | 442.60 | 25.7 | 15.5 | -      | 40 | -      | 364.41 |
| 21 | 300 |                       | 240.52 | 475.19 | 25.1 | 22.4 | 86.12  | -  | -      | -      |
|    |     |                       | 240.10 | 484.34 | 20.8 | 21.8 | 93.17  | -  | -      | -      |
| 22 | 300 |                       | 233.80 | 507.33 | 23.7 | 22.3 | 198.69 | -  | -      | -      |
|    |     |                       | 237.03 | 531.12 | 19.0 | 22.9 | 200.94 | -  | -      | -      |
| 23 | 300 |                       | 260.77 | 490.78 | 23.2 | 21.9 | 301.24 | -  | -      | -      |
|    |     |                       | 236.81 | 481.24 | 18.4 | 19.0 | 299.68 | -  | -      | -      |
| 24 | 300 |                       | 234.41 | 460.56 | 20.4 | 22.8 | 88.85  | -  | 93.49  | -      |
|    |     |                       | 236.04 | 495.15 | 22.3 | 20.1 | 98.20  | -  | 96.37  | -      |
| 25 | 300 | SO <sub>2</sub> -MgO- | 247.28 | 424.28 | 22.1 | 21.8 | 97.25  | -  | 200.89 | -      |
|    |     | O <sub>3</sub>        | 239.04 | 431.54 | 19.2 | 19.1 | 96.9   | -  | 198.39 | -      |
| 26 | 300 |                       | 238.41 | 463.31 | 22.3 | 23.6 | 83.75  | -  | 350.59 | -      |
|    |     |                       | 232.51 | 454.03 | 18.9 | 19.6 | 88.42  | -  | 371.42 | -      |
| 27 | 300 |                       | 226.07 | 422.60 | 16.9 | 23.1 | 92.36  | -  | -      | 69.00  |
|    |     |                       | 231.56 | 428.36 | 17.5 | 24.7 | 94.61  | -  | -      | 69.90  |
| 28 | 300 |                       | 225.70 | 478.60 | 23.4 | 23.6 | 98.28  | -  | -      | 153.27 |
|    |     |                       | 238.94 | 493.21 | 19.6 | 19.4 | 95.80  | -  | -      | 152.12 |
| 29 | 300 |                       | 254.24 | 413.24 | 21.5 | 21.9 | 88.51  | -  | -      | 309.03 |
|    |     |                       | 240.72 | 437.35 | 19.5 | 17.2 | 94.20  | -  | -      | 297.06 |
